# Supplementary material for: Inhibition of Bacterial Efflux Pumps by Crude Extracts and Essential Oil from Myristica fragrans Houtt. (Nutmeg) Seeds against Methicillin-Resistant Staphylococcus aureus
Source: MDPI journal article supplement (doi:10.3390/molecules26154662), 2021-07-31
Supplement: s1 [file s1]

## Supplementary data

**Table S1.** GCMS analysis of nutmeg crude extract.

| No. | Peak area (%) | Peak name                               | RT (min) | Area     | %Prob  |
|-----|---------------|-----------------------------------------|----------|----------|--------|
| 1   | 22.663        | Elemicin                                | 33.028   | 3.97E+08 | 37.100 |
| 2   | 15.234        | Tetradecanoic acid                      | 40.898   | 2.67E+08 | 50.300 |
| 3   | 11.183        | Myristicin                              | 31.564   | 1.96E+08 | 73.800 |
| 4   | 6.880         | 4-Terpineol                             | 16.724   | 1.20E+08 | 48.200 |
| 5   | 5.771         | Sabinene                                | 8.046    | 1.01E+08 | 26.300 |
| 6   | 2.774         | Methoxyeugenol                          | 34.719   | 4.85E+07 | 90.200 |
| 7   | 2.740         | 4-Thujanol, cis                         | 13.158   | 4.80E+07 | 28.900 |
| 8   | 2.603         | Decanoic acid, 2-oxo-, methyl ester     | 48.064   | 4.56E+07 | 12.500 |
| 9   | 2.283         | Safrene                                 | 21.682   | 4.00E+07 | 38.900 |
| 10  | 2.283         | n-Hexadecanoic acid                     | 46.120   | 4.00E+07 | 45.900 |
| 11  | 2.238         | 4-Thujanol                              | 11.802   | 3.92E+07 | 56.200 |
| 12  | 1.826         | Isoelemicin                             | 36.483   | 3.20E+07 | 66.500 |
| 13  | 1.746         | Isoeugenol                              | 28.603   | 3.06E+07 | 18.200 |
| 14  | 1.709         | beta-Pinene                             | 8.158    | 2.99E+07 | 17.400 |
| 15  | 1.446         | Methyleugenol                           | 26.744   | 2.53E+07 | 55.000 |
| 16  | 1.274         | gamma-Terpinene                         | 11.435   | 2.23E+07 | 34.000 |
| 17  | 1.161         | alpha-thujene                           | 6.461    | 2.03E+07 | 32.300 |
| 18  | 1.115         | beta-Phellandrene                       | 10.173   | 1.95E+07 | 25.900 |
| 19  | 0.958         | alpha-Pinene                            | 6.679    | 1.68E+07 | 16.500 |
| 20  | 0.909         | Oleic Acid                              | 48.716   | 1.59E+07 | 11.300 |
| 21  | 0.830         | Octadecanoic acid, 3-oxo-, methyl ester | 50.636   | 1.45E+07 | 20.800 |
| 22  | 0.798         | alpha-Terpineol                         | 17.315   | 1.40E+07 | 25.500 |
| 23  | 0.782         | Benzoic acid, 2-acetyl-3-methoxy-       | 57.869   | 1.37E+07 | 22.300 |
| 24  | 0.758         | 2-Carene                                | 9.674    | 1.33E+07 | 18.200 |
| 25  | 0.699         | Cyclopentaneundecanoic acid             | 53.573   | 1.22E+07 | 18.400 |
| 26  | 0.642         | beta-Caryophyllene                      | 27.225   | 1.12E+07 | 36.300 |
| 27  | 0.589         | Dodecanoic acid                         | 33.414   | 1.03E+07 | 54.500 |
| 28  | 0.562         | alpha-Terpineol acetate                 | 24.305   | 9.83E+06 | 46.700 |
| 29  | 0.559         | Geraniol acetate                        | 25.807   | 9.79E+06 | 61.400 |
| 30  | 0.554         | Isoeugenol methyl ether                 | 30.568   | 9.70E+06 | 28.400 |
| 31  | 0.515         | Copaene                                 | 25.404   | 9.02E+06 | 18.600 |
| 32  | 0.466         | Terpinolene                             | 12.704   | 8.15E+06 | 13.500 |
| 33  | 0.436         | beta-Myrcene                            | 8.672    | 7.63E+06 | 69.400 |
| 34  | 0.392         | beta-Cymene                             | 9.993    | 6.85E+06 | 23.500 |
| 35  | 0.380         | trans-Pinene hydrate                    | 14.168   | 6.65E+06 | 35.600 |
| 36  | 0.350         | Linalool                                | 13.243   | 6.12E+06 | 36.500 |
| 37  | 0.307         | 2-(3-Methylphenyl)-2-propanol           | 17.095   | 5.37E+06 | 41.400 |
| 38  | 0.260         | Hedycaryol                              | 32.509   | 4.54E+06 | 26.400 |
| 39  | 0.222         | 4-Carene, (1S,3S,6R)-(-)-               | 9.421    | 3.88E+06 | 14.300 |
| 40  | 0.221         | beta-Cubebene                           | 29.762   | 3.87E+06 | 19.300 |
| 41  | 0.213         | Citronellol acetate                     | 24.495   | 3.73E+06 | 32.400 |
| 42  | 0.197         | o-Eugenol                               | 24.728   | 3.45E+06 | 17.500 |
| 43  | 0.190         | Isobornyl acetate                       | 21.545   | 3.33E+06 | 25.200 |
| 44  | 0.166         | alpha-Fellandrene                       | 9.188    | 2.91E+06 | 36.200 |
| 45  | 0.161         | trans-Piperitol                         | 18.096   | 2.82E+06 | 29.100 |

**Table S2.** GCMS analysis of nutmeg essential oil.

| No. | Peak area (%) | Peak name                        | RT (min) | Area    |
|-----|---------------|----------------------------------|----------|---------|
| 1   | 36.907        | Sabinene                         | 11.726   | 5.6E+09 |
| 2   | 11.544        | 4-Terpineol                      | 21.444   | 1.8E+09 |
| 3   | 9.414         | alpha-Pinene                     | 9.760    | 1.4E+09 |
| 4   | 6.135         | beta-Phellandrene                | 14.149   | 9.4E+08 |
| 5   | 4.445         | (-)-BETA-PINEN                   | 11.784   | 6.8E+08 |
| 6   | 3.312         | gamma-Terpinene                  | 15.575   | 5.1E+08 |
| 7   | 2.624         | beta-Myrcene                     | 12.415   | 4.0E+08 |
| 8   | 2.551         | Myristicin                       | 36.323   | 3.9E+08 |
| 9   | 2.549         | cis-Asarone                      | 37.741   | 3.9E+08 |
| 10  | 1.884         | 1,3-Benzodioxole, 5-(2-propenyl) | 26.392   | 2.9E+08 |
| 11  | 1.826         | alpha-Terpinene                  | 13.504   | 2.8E+08 |
| 12  | 1.774         | alpha-Thujene                    | 9.433    | 2.7E+08 |
| 13  | 1.690         | m-Cymene                         | 13.910   | 2.6E+08 |
| 14  | 1.586         | 3-Carene                         | 13.175   | 2.4E+08 |
| 15  | 1.464         | Terpinolene                      | 16.937   | 2.2E+08 |
| 16  | 1.372         | Tetradecanoic acid               | 45.666   | 2.1E+08 |
| 17  | 1.002         | alpha-Terpineol                  | 21.962   | 1.5E+08 |
| 18  | 0.944         | Methyleugenol                    | 31.507   | 1.4E+08 |
| 19  | 0.781         | 4-THUJANOL, STEREOISOMER         | 15.980   | 1.2E+08 |
| 20  | 0.733         | alpha-Phellandrene               | 12.897   | 1.1E+08 |
| 21  | 0.710         | p-Menth-2-en-1-ol, trans         | 18.571   | 1.1E+08 |
| 22  | 0.710         | 4-THUJANOL, CIS-(+.-)-           | 17.466   | 1.1E+08 |
| 23  | 0.573         | beta-Linalool                    | 17.641   | 8.8E+07 |
| 24  | 0.452         | p-Menth-2-en-1-ol, cis           | 19.487   | 6.9E+07 |
| 25  | 0.424         | Geraniol acetate                 | 30.481   | 6.5E+07 |
| 26  | 0.252         | Citronellol acetate              | 29.162   | 3.9E+07 |
| 27  | 0.252         | trans-Piperitol                  | 22.705   | 3.9E+07 |
| 28  | 0.241         | alpha-Terpineol acetate          | 28.945   | 3.7E+07 |
| 29  | 0.199         | Copaene                          | 30.016   | 3.1E+07 |
| 30  | 0.190         | Borneol acetate                  | 26.124   | 2.9E+07 |
| 31  | 0.181         | Isoeugenol methyl ether          | 35.312   | 2.8E+07 |
| 32  | 0.165         | cis-Piperitol                    | 22.112   | 2.5E+07 |
| 33  | 0.153         | Camphene                         | 10.275   | 2.3E+07 |
| 34  | 0.142         | Isoelemicin                      | 41.186   | 2.2E+07 |
| 35  | 0.113         | Cuminol                          | 21.768   | 1.7E+07 |
| 36  | 0.113         | trans-alpha-Bergamotene          | 32.559   | 1.7E+07 |
| 37  | 0.095         | Germacrene D                     | 34.392   | 1.5E+07 |
| 38  | 0.089         | trans-Geraniol                   | 24.904   | 1.4E+07 |
| 39  | 0.082         | TRANS-SABINENE HYDRATE ACETATE   | 26.790   | 1.3E+07 |
| 40  | 0.081         | Farnesol                         | 35.553   | 1.2E+07 |
| 41  | 0.079         | Caryophyllene                    | 31.837   | 1.2E+07 |
| 42  | 0.075         | beta-Citronellol                 | 23.719   | 1.1E+07 |
| 43  | 0.048         | Dodecanoic acid                  | 38.195   | 7.3E+06 |
| 44  | 0.045         | Eugenol                          | 29.414   | 7.0E+06 |

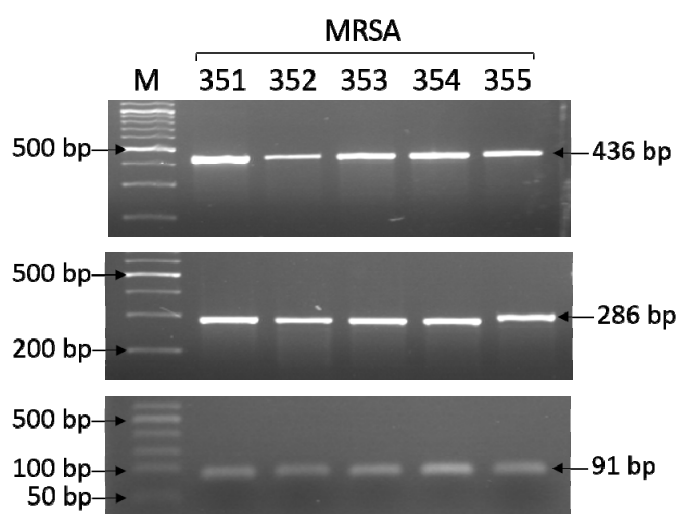

**Figure S1.** Agarose gel electrophoresis of five MRSA isolates. Identification of resistant strains was performed by detection of *mecA* gene (middle, 286 bp), and identification of efflux pumps were performed by detection of *norA* (upper, 436 bp) and *mepA* (lower, 91 bp) genes in all MRSA strains using PCR assay. Marker (M) and MRSA351-355 strains, respectively.

## Supplementary materials and methods

### 1. Total Phenolic content

Total Phenolic content (TPC) was determined using a modified method of Singleton V. L. and Rossi J.A. in 1965. The aqueous sample solution with concentration of 0-100  $\mu\text{g/mL}$  was prepared using a 96-well plate model, the reaction mixture that comprised 50  $\mu\text{L}$  of sample solution, 50  $\mu\text{L}$  of 50% v/v Folin-Ciocalteu reagent and 125  $\mu\text{L}$  of 20% w/v sodium carbonate was constituted and mixed gently. Following 40 min incubation at room temperature, the optical absorbance was determined at 700 nm using a microplate reader (Sunrise<sup>TM</sup> micro plate Reader, Männedorf, Switzerland) standard curve development (Gallic acid). TPC was expressed as mg gallic acid equivalence (mg GAE eq/g extract).

### 2. Total Flavonoid content

Total flavonoid content (TFC) was determined using a modified method of Chang, Zuo, Harrison and Chow in 2002. The sample aqueous solution with concentration of 0-100  $\mu\text{g/mL}$  was prepared using a 96-well plate model, the reaction mixture that comprised 100  $\mu\text{L}$  of sample solution, 100  $\mu\text{L}$  of 2%(w/v)  $\text{AlCl}_3$  solution was constituted and mixed gently. Following 30 min incubation at room temperature, the optical absorbance was determined at wavelength of 437 nm using microplate reader (Sunrise<sup>TM</sup> micro plate Reader, Männedorf, Switzerland) standard curve development (Quercetin). TFC was expressed as quercetin equivalence (mg QE eq/g extract).
